# Supplementary material for: Loss of β-catenin in resident cardiac fibroblasts attenuates fibrosis induced by pressure overload in mice
Source: PubMed Central journal article supplement (PMC5620049; doi:10.1038/s41467-017-00840-w), 2017-09-28
Supplement: 41467_2017_840_MOESM1_ESM.pdf [file 41467_2017_840_MOESM1_ESM.pdf]

**A**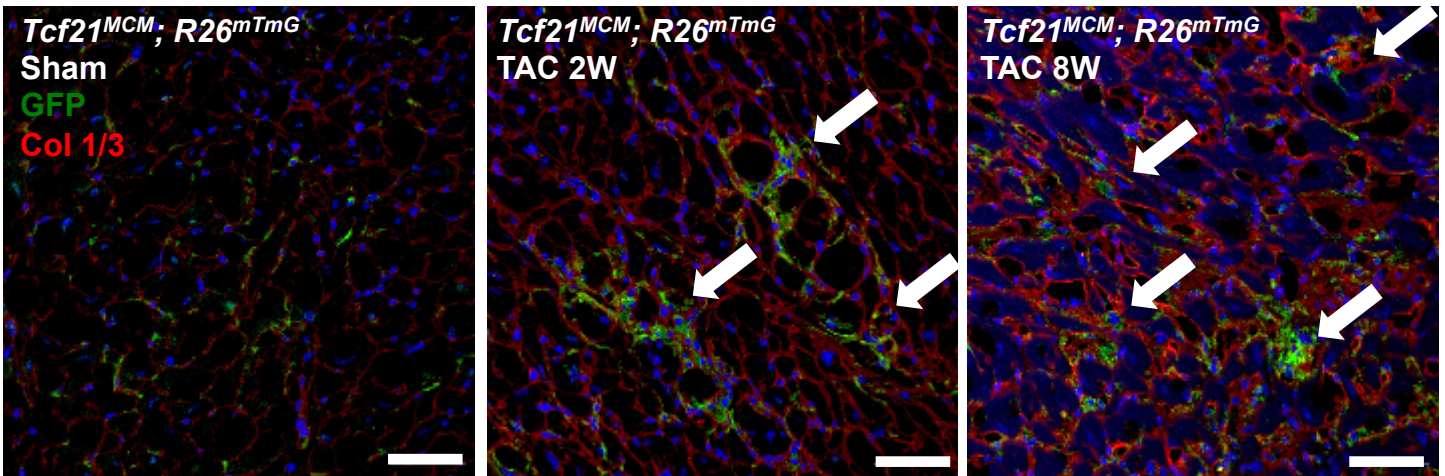**B**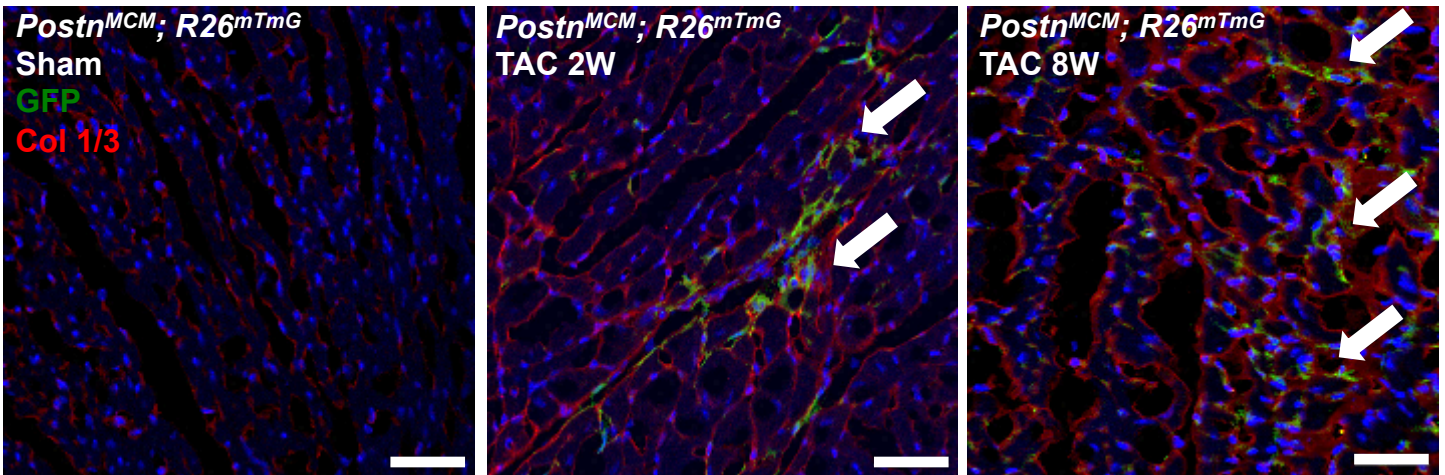

**Supplementary Figure 1. Co-localization of Tcf21 and Postn lineage CFs with Collagen 1/3 in mouse hearts subjected to TAC.** Representative images of GFP (Green) and Collagen 1/3 (Red) co-staining in *Tcf21<sup>MCM</sup>;R26<sup>mTmG</sup>* (A) and *Postn<sup>MCM</sup>;R26<sup>mTmG</sup>* (B) hearts 2 weeks (W) or 8W after sham or TAC surgeries are shown. GFP<sup>+</sup> cells are present in areas of Col1/3 deposition (arrows). Scale bar=50 $\mu$ m.

**A**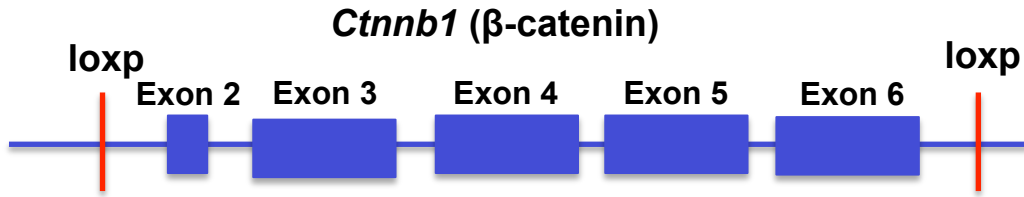**B**

**Experimental group:**

*Tcf21<sup>MCM</sup>;Ctnnb1<sup>fl/fl</sup>*

*Postn<sup>MCM</sup>;Ctnnb1<sup>fl/fl</sup>*

**Littermate control group:**

*Ctnnb1<sup>fl/fl</sup>*

**TAM food**

**8 week**

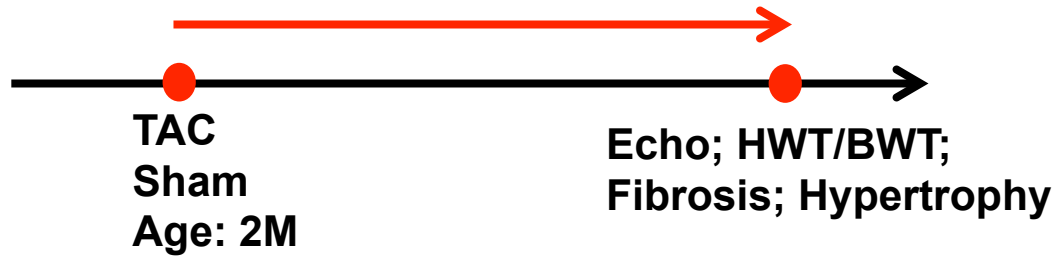**C**

**Experimental group:**

*Tcf21<sup>MCM</sup>;Ctnnb1<sup>fl/fl</sup>;R26<sup>mTmG</sup>*  
(β-catenin LOF)

**Littermate control group:**

*Tcf21<sup>MCM</sup>;Ctnnb1<sup>fl/+</sup>;R26<sup>mTmG</sup>*  
(Ctrl)

**TAM food**

**4 week**

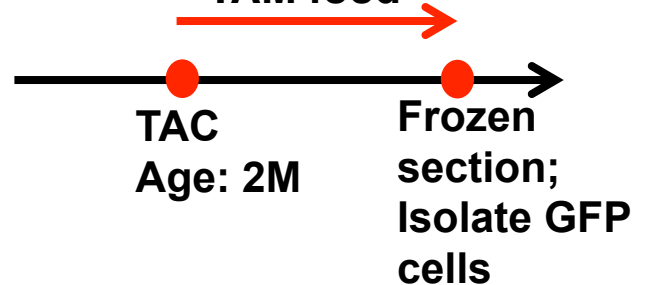**D**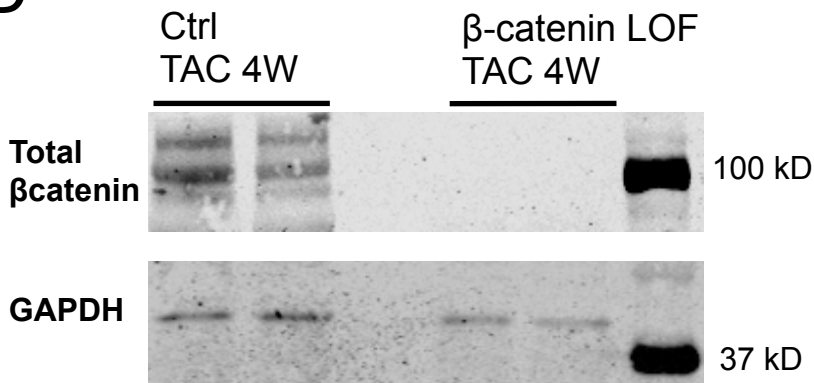**E**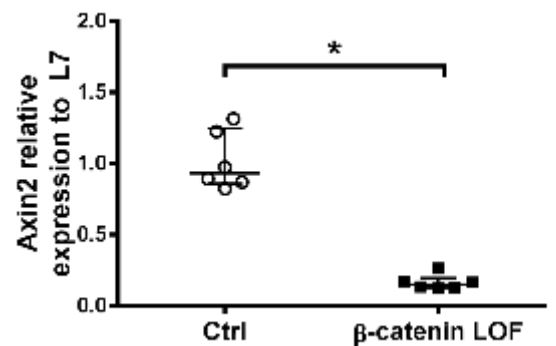

**Supplementary Figure 2. Experimental design for conditional  $\beta$ -catenin loss-of-function (LOF) in adult Tcf21 and Postn lineages after cardiac pressure overload (TAC).** A) Illustration of the  $\beta$ -catenin LOF locus with *loxP* sites flanking Exons 2 and 6 of the *Ctnnb1* gene. B) *Tcf21<sup>MCM</sup>;Ctnnb1<sup>fl/fl</sup>* and *Postn<sup>MCM</sup>;Ctnnb1<sup>fl/fl</sup>* mice were used for CF-specific  $\beta$ -catenin LOF. Cre-negative *Ctnnb1<sup>fl/fl</sup>* littermate mice were used as control groups. At the age of 2 months, both groups were randomly subjected to either sham or TAC surgery. CF-specific  $\beta$ -catenin LOF was induced after surgery via tamoxifen food ( $\approx 40$  mg/body weight/day). Mice were maintained on tamoxifen food until termination. Eight weeks post-surgery, echocardiography was performed and mice were sacrificed. Heart samples were harvested for further experiments. C) *Tcf21<sup>MCM</sup>;R26<sup>mTmG</sup>;Ctnnb1<sup>fl/fl</sup>* ( $\beta$ -catenin LOF) mice were used to label and trace Tcf21 lineage CFs with  $\beta$ -catenin LOF. *Tcf21<sup>MCM</sup>;R26<sup>mTmG</sup>;Ctnnb1<sup>fl/+</sup>* (control) mice were used as controls. At 2 months, both groups were randomly subjected to TAC or sham surgery. CF-specific  $\beta$ -catenin LOF was induced right after surgery via tamoxifen food ( $\approx 40$  mg/body weight/day). Mice were maintained on tamoxifen food for 4 weeks. Four weeks post-surgery, hearts were collected for immunostaining or isolation of GFP-labeled CFs. D) Loss of  $\beta$ -catenin in GFP<sup>+</sup> cells from *Tcf21<sup>MCM</sup>;R26<sup>mTmG</sup>;Ctnnb1<sup>fl/fl</sup>* ( $\beta$ -catenin LOF) hearts was confirmed by Western blot analysis in N=2 experiments of 3 hearts each. E) Expression of *Axin2* mRNA was also significantly reduced in GFP<sup>+</sup> cells from *Tcf21<sup>MCM</sup>;R26<sup>mTmG</sup>;Ctnnb1<sup>fl/fl</sup>*  $\beta$ -catenin LOF hearts compared to controls. N=6 hearts/group. Data points are shown with median and interquartile ranges indicated. Statistical significance was determined using unpaired Mann-Whitney U tests: \* $P < 0.05$  versus control.



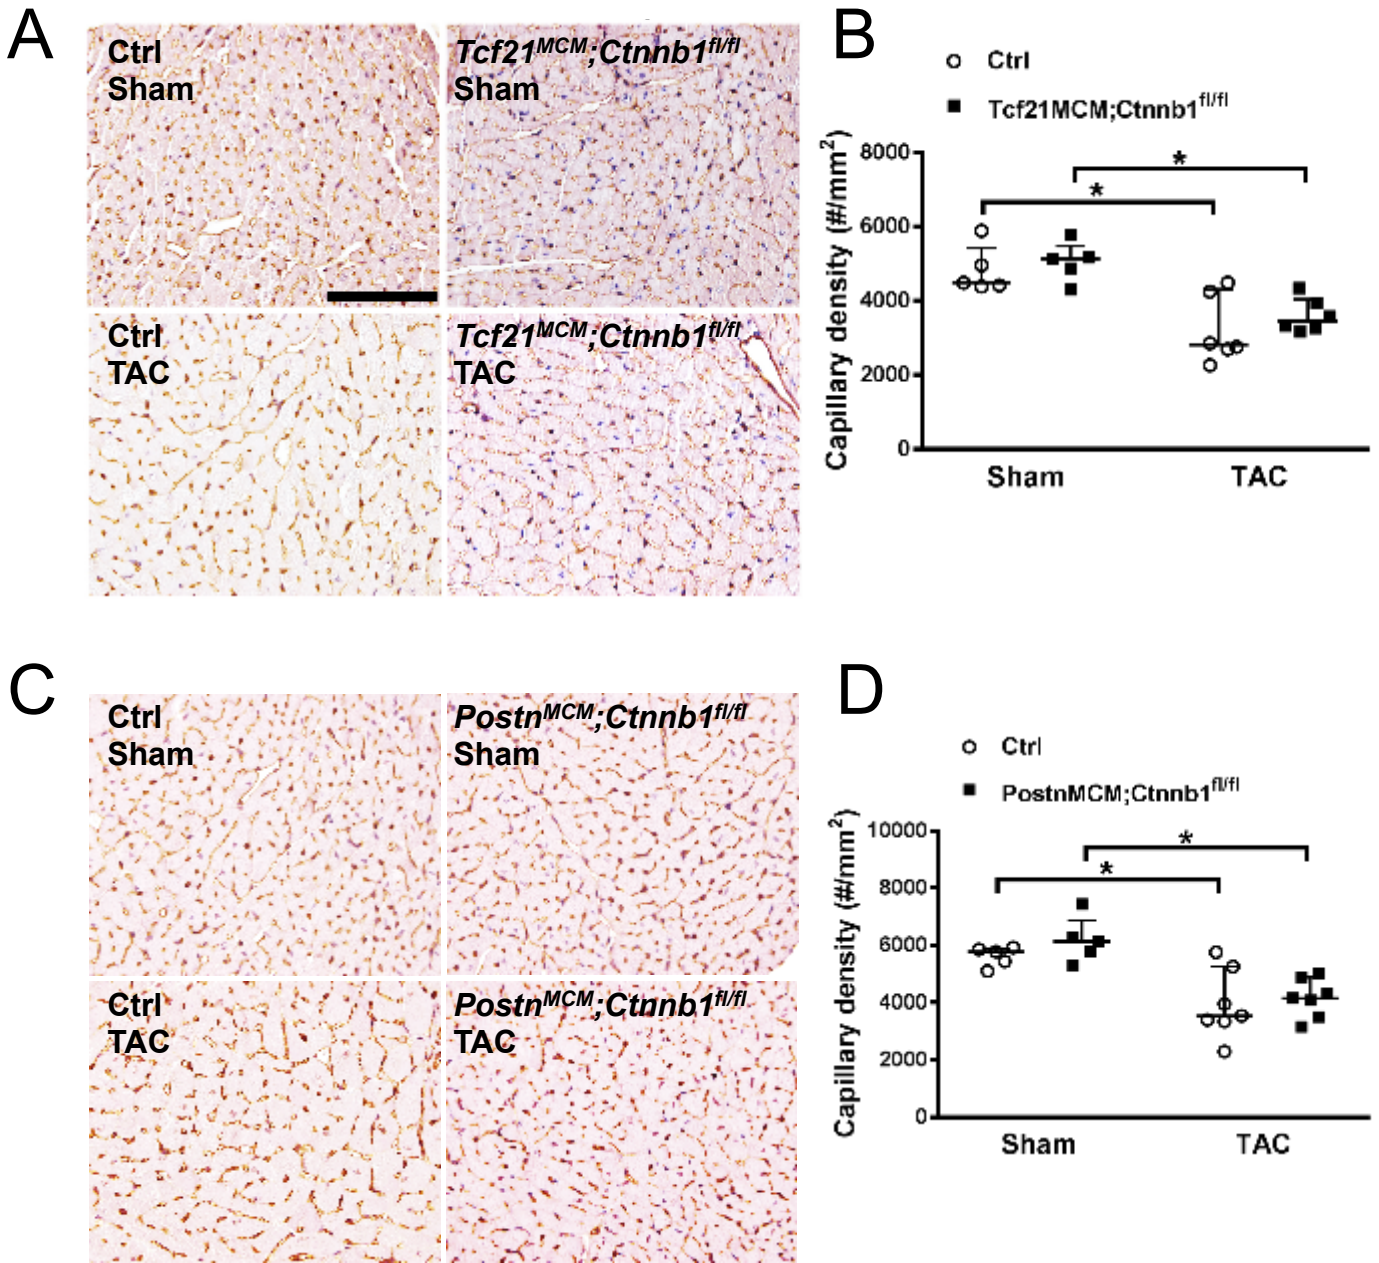

**Supplementary Figure 3. Capillary density 8 weeks after TAC.** A,C) Representative images of Lectin1 staining in Ctrl and  $\beta$ -catenin LOF hearts 8 weeks after TAC are shown. Myocardial capillary density significantly decreased 8 weeks after TAC but no difference was observed between Ctrl and *Tcf21<sup>MCM</sup>;Ctnnb1<sup>fl/fl</sup>* (B) and *Postn<sup>MCM</sup>;Ctnnb1<sup>fl/fl</sup>* mice (D) N=5-7 hearts/group. Data points are shown with median and interquartile ranges indicated. Statistical significance was determined using unpaired Mann-Whitney U tests: \*P<0.05 vs Ctrl. Scale bar=100 $\mu$ m.

**A**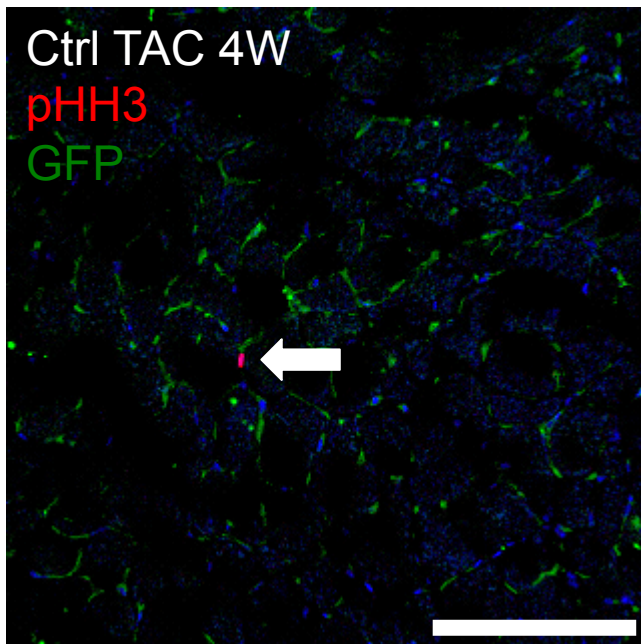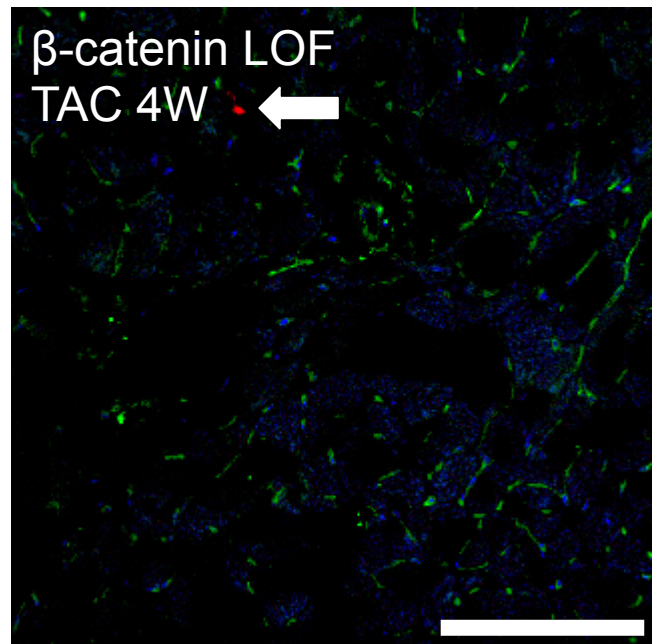**B**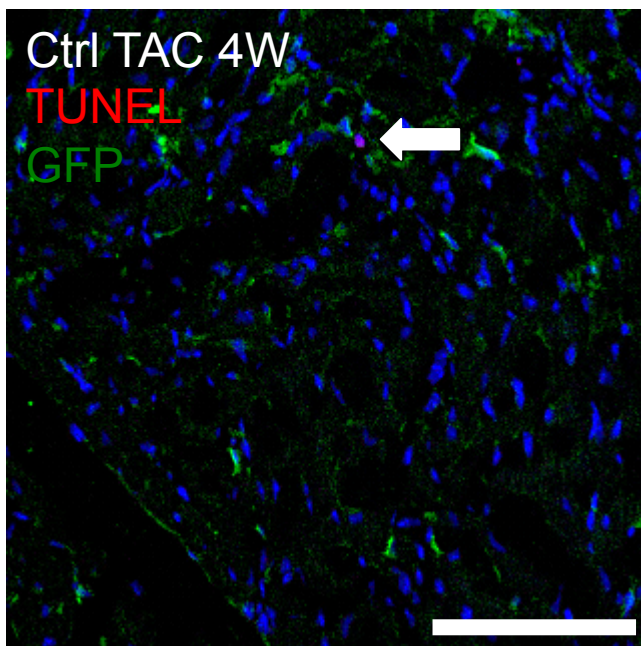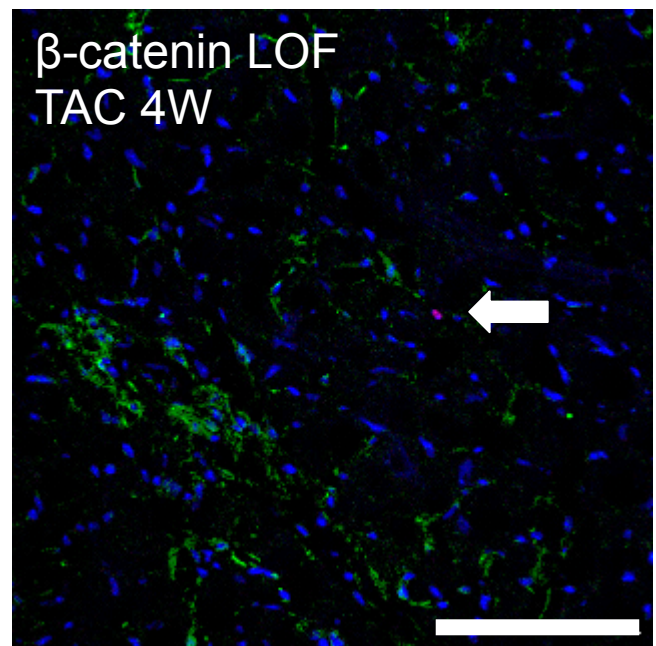

**Supplementary Figure 4. Proliferation and apoptosis were barely detected in GFP<sup>+</sup> Tcf21 lineage CFs 4 weeks after TAC.** A) Representative images of GFP (Green) and pHH3 (Red) co-staining in *Tcf21<sup>MCM</sup>*  $\beta$ -catenin LOF and control hearts 4 weeks after TAC are shown. B) Representative images of GFP (Green) and TUNEL (Red) co-staining in  $\beta$ -catenin LOF and control hearts 4 weeks after TAC are shown. Very few pHH3<sup>+</sup>/GFP<sup>+</sup> and TUNEL<sup>+</sup>/GFP<sup>+</sup> cells (white arrows) were found in myocardium. Scale bar=100 $\mu$ m.



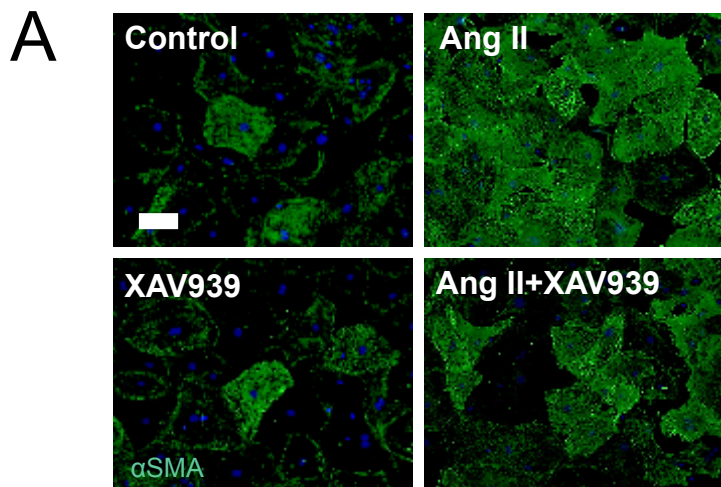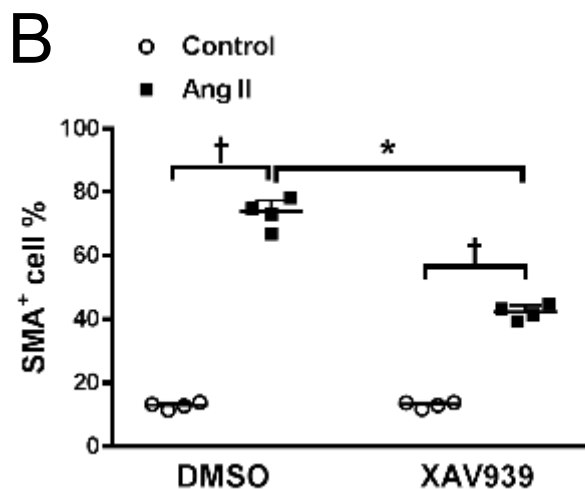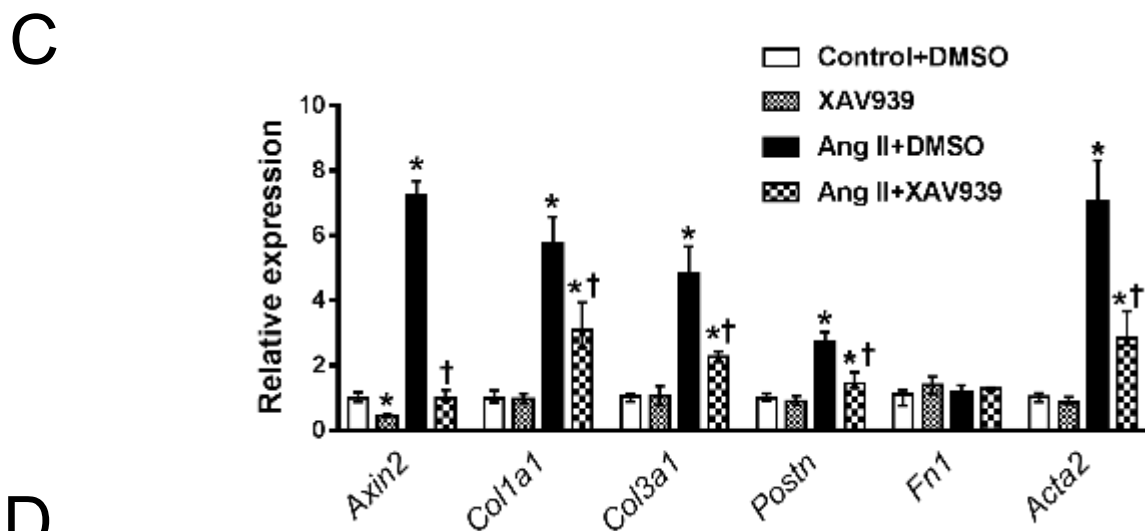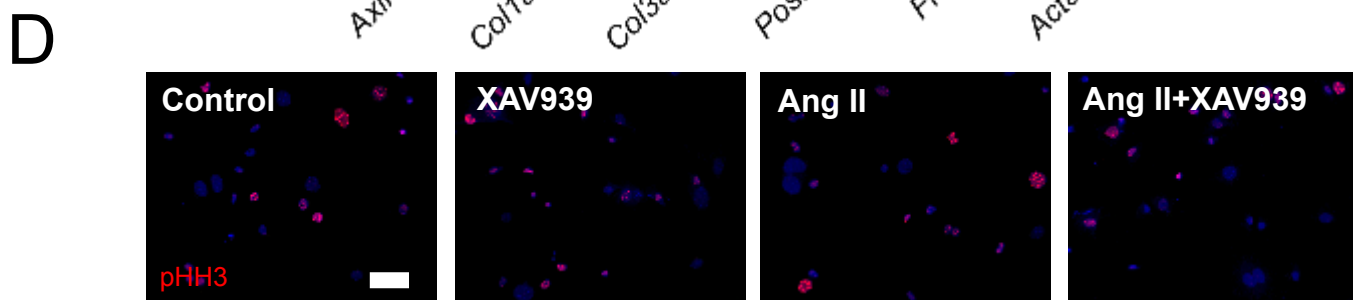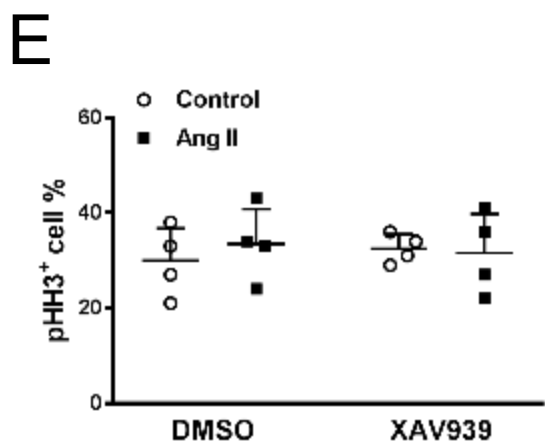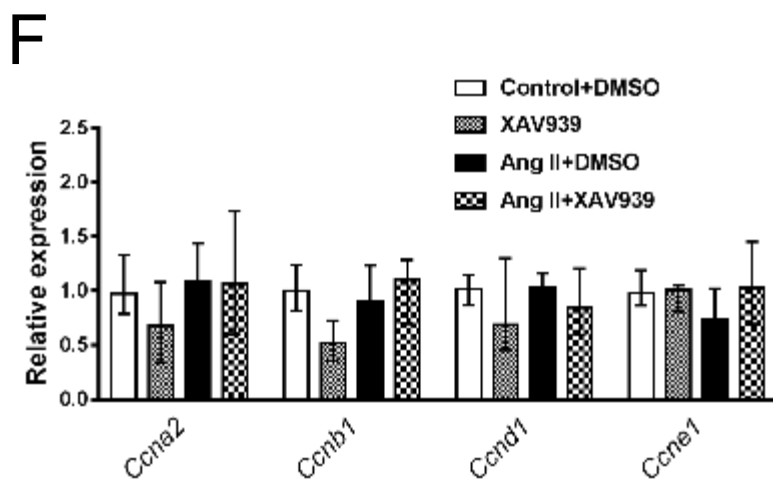

**Supplementary Figure 5. Wnt/ $\beta$ -catenin signaling contributes to Angiotensin II (Ang II) induced cardiomyocyte CF activation.** A) Representative images of  $\alpha$ SMA (Green) staining in cultured P60 CFs under indicated conditions are shown. Scale bar=100 $\mu$ m. B) Ang II (100nM) induces significantly more  $\alpha$ SMA+ CFs relative to DMSO controls in cultured P60 CFs. Inhibition of Wnt/ $\beta$ -catenin signaling by XAV939 (5 $\mu$ M) partially abrogated Ang II-induced  $\alpha$ SMA expression in CF. \*P<0.05 vs DMSO groups, † P<0.05 vs. Control . C) mRNA expression of the Wnt target gene *Axin2*, and ECM genes *Coll1a1*, *Col3a1*, *Postn* and *Acta2* in P60 CFs with indicated treatments was measured by qPCR. \*P<0.05 vs control, † P<0.05 vs. DMSO. D) Representative images of pHH3 (Red) staining in cultured P60 CFs under indicated conditions are shown. Scale bar=100 $\mu$ m. No difference in proliferating CF percentage (E) and cell-cycle genes (F) *Ccna2*, *Ccnb1*, *Ccnd1* and *Ccne1* expression was observed among groups. N=4 independent cultures/group. Statistical significance was determined by Kruskal-Wallis tests followed Mann-Whitney U tests for pairwise comparisons using Bonferonni adjustments to control for multiple testing. Data points are shown with median and interquartile ranges indicated.

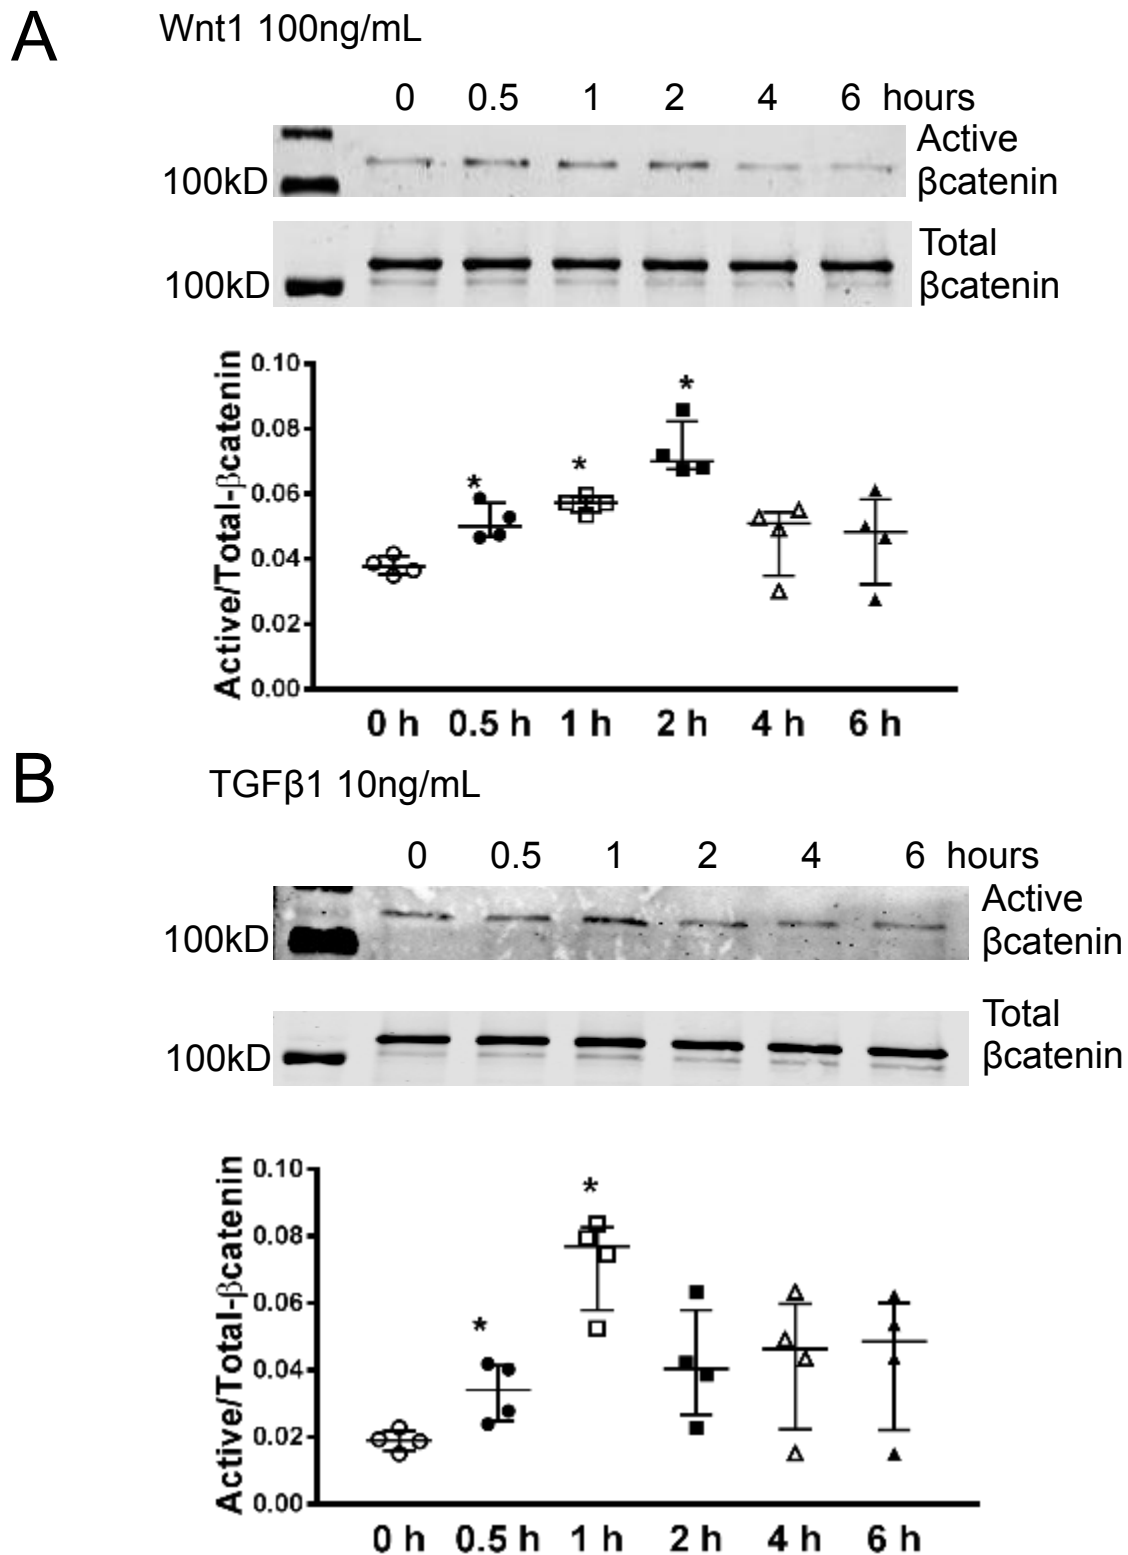

**Supplementary Figure 6. Wnt1 and TGFβ1 induce β-catenin activation in cultured P60 CFs.** A) Wnt1 induces β-catenin activation in cultured P60 CFs as determined by Western analysis. B) TGFβ1 induces β-catenin activation in cultured P60 CFs as determined by Western analysis. Data points are shown with median and interquartile ranges indicated. Statistical significance was determined using unpaired Mann-Whitney U tests: \* $P < 0.05$  versus 0 h. N=4 independent cultures.



# A

## ChIP sequence tracks for *Col3a1*

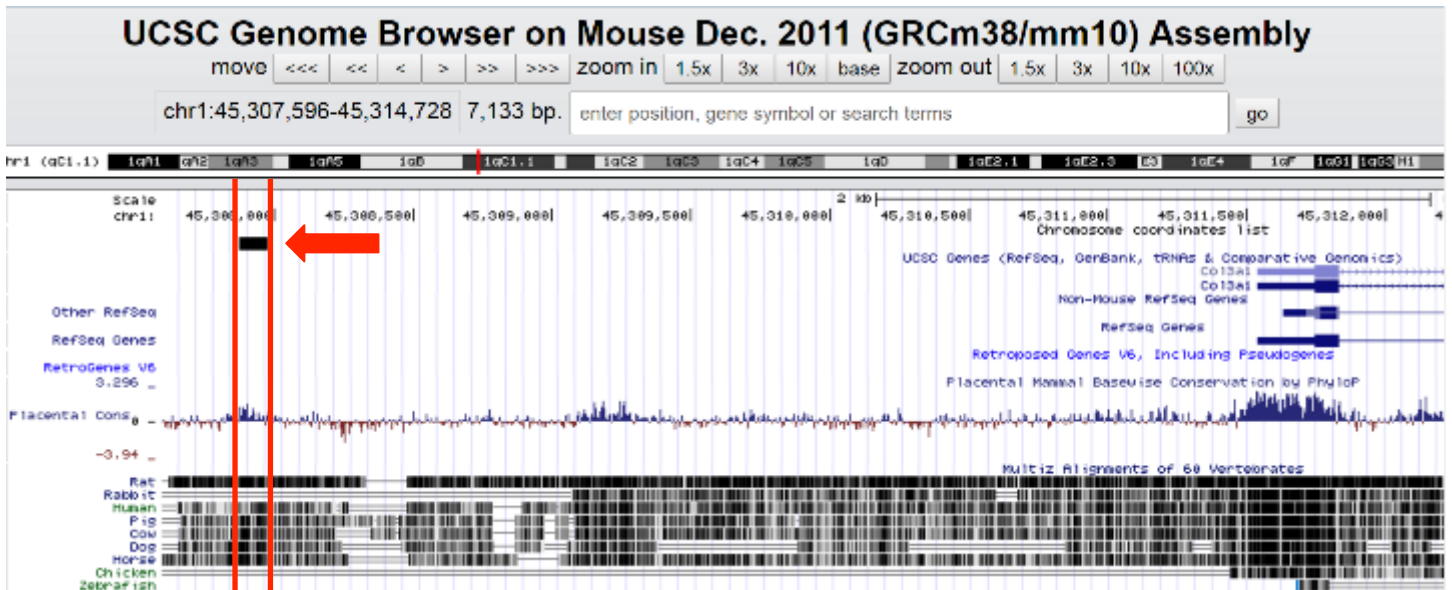

# B

## ChIP sequence tracks for *Postn*

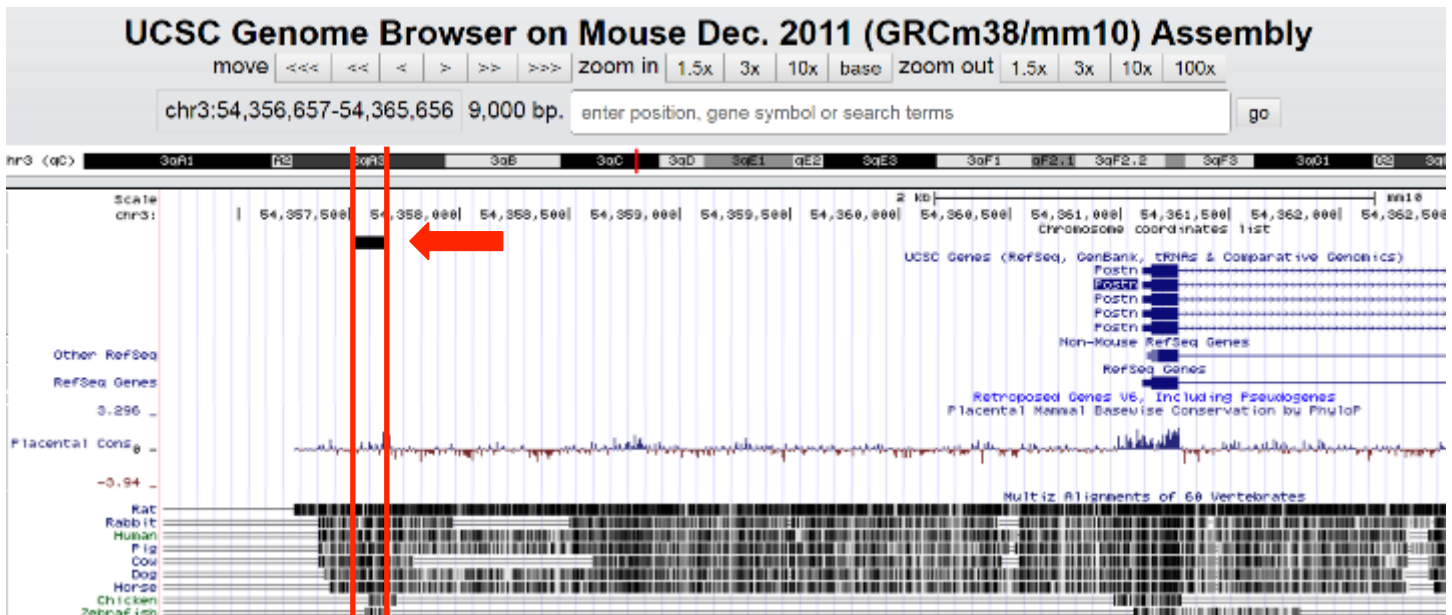

**Supplementary Figure 7. Genomic sequences containing LEF binding domains for *Col3a1* and *Postn* loci amplified in  $\beta$ -catenin ChIP assays.** Screen shots of UCSC genome browser21 (UCSC Genome Browser on Mouse Dec 2011 (GRCm38/mm10)) show LEF binding domains (red arrow) for *Col3a1* (A) and *Postn* (B) that were amplified in  $\beta$ -catenin ChIP assays. These sequences have high conservation among species.

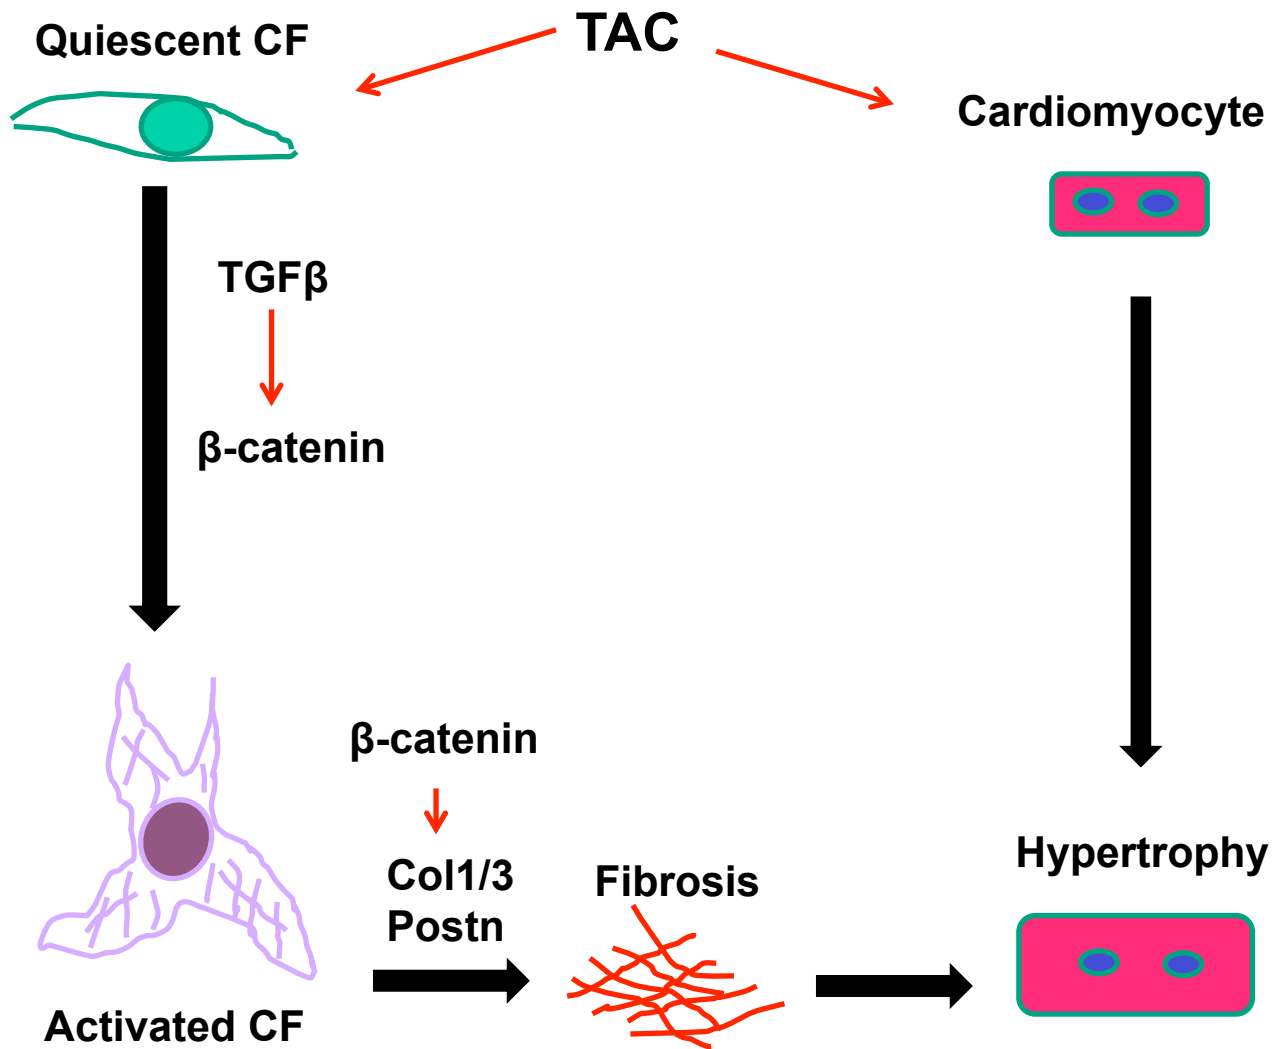

**Supplementary Figure 8. Model for Wnt/β-catenin signaling in CFs after pressure-overload injury induced by TAC.** In TAC-induced pressure overload injury, Wnt/β-catenin is required for the synthetic phenotype in CFs as indicated by fibrotic gene expression, including *Colla1*, *Col3a1* and *Postn*. With loss of β-catenin in Tcf21 or *Postn* lineage cells, reduced fibrotic ECM gene expression and cardiomyocyte hypertrophy is the primary outcome after TAC-induced pressure overload injury in mice. Moreover, Wnt/β-catenin may also act downstream in TGFβ induced CF activation. Therefore, Wnt/β-catenin in CFs plays an important and integral role for fibrosis and hypertrophy development.

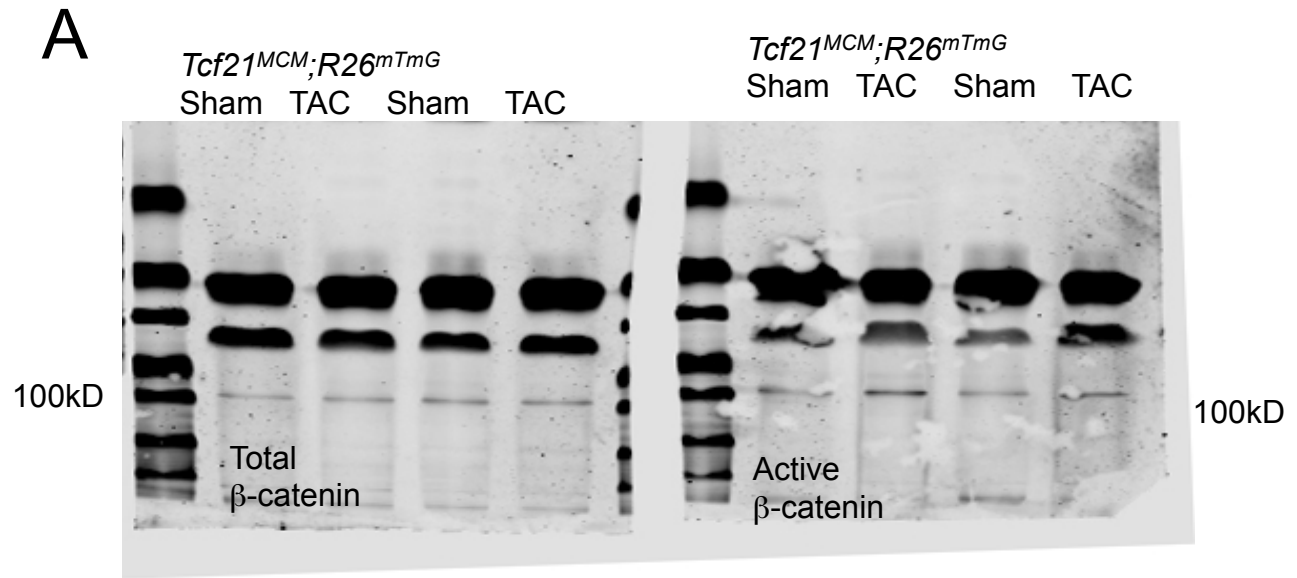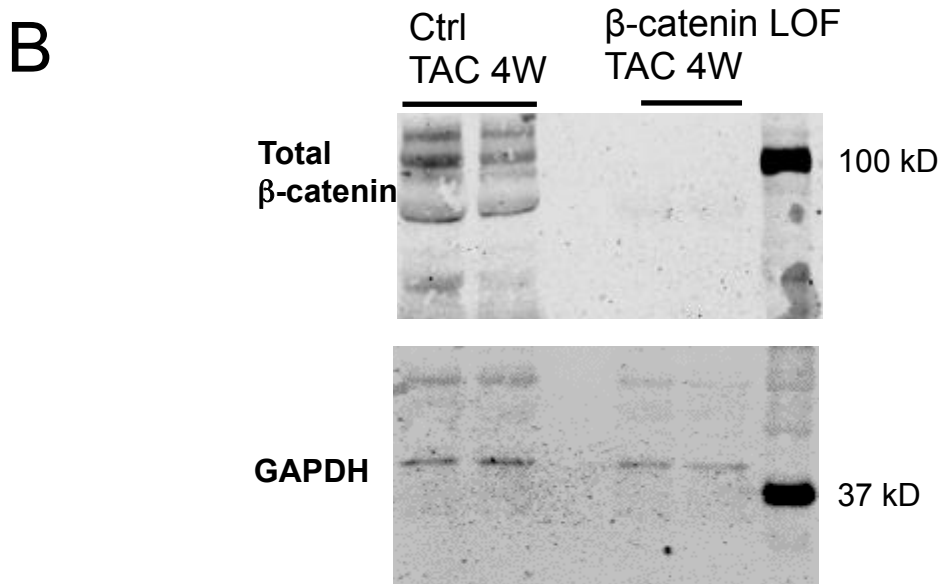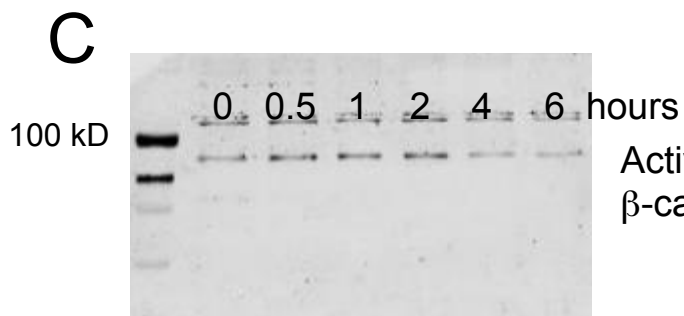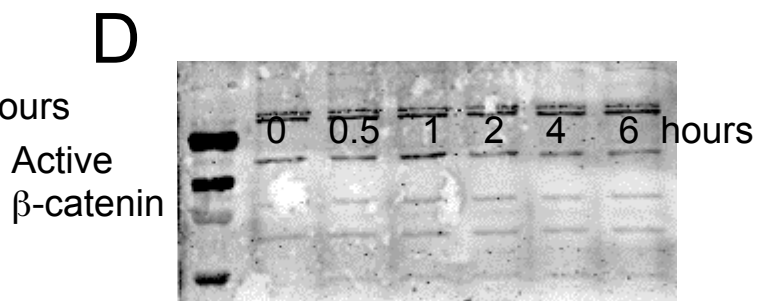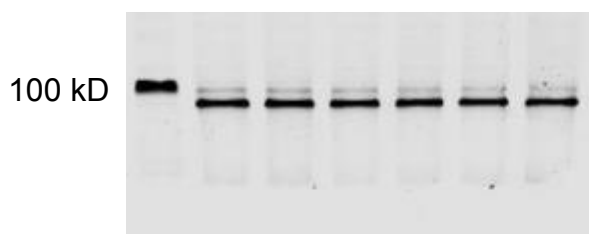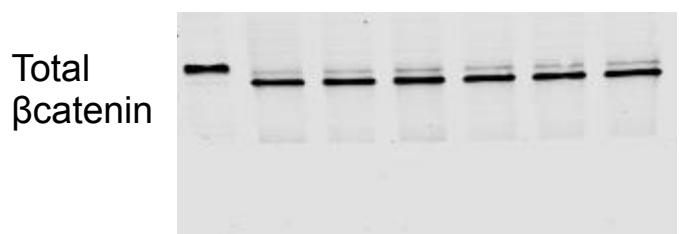

**Supplementary Figure 9. Original Western blot images.** Original Western blot images are shown for Figure 1C (A), Supplementary Figure 2D (B), Supplementary Figure 6A (C), and Supplementary Figure 6B (D).



**Supplementary Table 1:** Cardiac function measured by echocardiography 8 weeks post-TAC or sham surgery:

|                                         | <b>Control<br/>sham N=5</b> | <b><i>Tcf21<sup>MCM</sup>;Ctnnb1<sup>fl/fl</sup></i><br/>sham N=5</b> | <b>Control<br/>MI N=6</b> | <b><i>Tcf21<sup>MCM</sup>;Ctnnb1<sup>fl/fl</sup></i><br/>MI N=6</b> |
|-----------------------------------------|-----------------------------|-----------------------------------------------------------------------|---------------------------|---------------------------------------------------------------------|
| <b>IVSd (mm)</b>                        | 0.78±0.03                   | 0.72±0.09                                                             | 1.07±0.07*                | 1.09±0.07*                                                          |
| <b>IVSs (mm)</b>                        | 1.17±0.05                   | 1.04±0.12                                                             | 1.26±0.05                 | 1.37±0.08                                                           |
| <b>LVIDd<br/>(mm)</b>                   | 3.67±0.16                   | 3.87±0.06                                                             | 5.20±0.15*                | 4.22±0.08*†                                                         |
| <b>LVIDs<br/>(mm)</b>                   | 2.51±0.13                   | 2.59±0.11                                                             | 4.55±0.17*                | 3.38±0.10*†                                                         |
| <b>LVPWd<br/>(mm)</b>                   | 0.89±0.09                   | 0.70±0.12                                                             | 1.05±0.07                 | 1.03±0.03                                                           |
| <b>LVPWs<br/>(mm)</b>                   | 1.10±0.10                   | 1.00±0.13                                                             | 1.15±0.07                 | 1.17±0.03                                                           |
| <b>EF (%)</b>                           | 60.61±1.88                  | 62.33±2.84                                                            | 26.98±2.35*               | 41.16±2.01*†                                                        |
| <b>FS (%)</b>                           | 31.78±1.30                  | 33.24±1.97                                                            | 12.66±1.19*               | 19.95±1.14*†                                                        |
| <b>LV mass</b>                          | 109.67±15.40                | 96.18±17.04                                                           | 262.83±17.41*             | 187.21±11.35*†                                                      |
| <b>LV mass<br/>corrected</b>            | 88.34±12.32                 | 77.55±13.63                                                           | 210.86±13.93*             | 150.36±9.08*†                                                       |
| <b>LV Vol d<br/>(μL)</b>                | 57.89±6.21                  | 64.99±2.46                                                            | 130.40±8.38*              | 79.54±3.59*†                                                        |
| <b>LV Vol s<br/>(μL)</b>                | 22.90±2.79                  | 24.72±2.72                                                            | 95.86±8.49*               | 47.01±3.34*†                                                        |
| <b>HR (bpm)</b>                         | 448.80±11.28                | 458.20±12.94                                                          | 441.50±5.96               | 443.67±10.51                                                        |
| <b>Pressure<br/>gradient<br/>(mmHg)</b> |                             |                                                                       | 51.17±1.72                | 50.50±2.17                                                          |

|                                         | <b>Control<br/>sham N=5</b> | <b><i>Postn<sup>MCM</sup>;Ctnnb1<sup>fl/fl</sup></i><br/>sham N=5</b> | <b>Control<br/>MI N=6</b> | <b><i>Postn<sup>MCM</sup>;Ctnnb1<sup>fl/fl</sup></i><br/>MI N=6</b> |
|-----------------------------------------|-----------------------------|-----------------------------------------------------------------------|---------------------------|---------------------------------------------------------------------|
| <b>IVSd (mm)</b>                        | 0.95±0.05                   | 0.90±0.03                                                             | 1.12±0.05                 | 1.08±0.08                                                           |
| <b>IVSs (mm)</b>                        | 1.21±0.16                   | 1.19±0.08                                                             | 1.30±0.04                 | 1.37±0.09                                                           |
| <b>LVIDd<br/>(mm)</b>                   | 4.02±0.15                   | 4.18±0.06                                                             | 5.16±0.06*                | 4.33±0.14*†                                                         |
| <b>LVIDs<br/>(mm)</b>                   | 2.83±0.15                   | 2.91±0.07                                                             | 4.75±0.07*                | 3.50±0.15*†                                                         |
| <b>LVPWd<br/>(mm)</b>                   | 0.62±0.04                   | 0.65±0.01                                                             | 1.20±0.12*                | 1.05±0.10                                                           |
| <b>LVPWs<br/>(mm)</b>                   | 1.01±0.08                   | 1.11±0.02                                                             | 1.25±0.11                 | 1.23±0.12                                                           |
| <b>EF (%)</b>                           | 57.44±2.48                  | 58.31±1.87                                                            | 17.27±1.62*               | 39.90±2.47*†                                                        |
| <b>FS (%)</b>                           | 29.88±1.65                  | 30.52±1.27                                                            | 7.85±0.76*                | 19.32±1.35*†                                                        |
| <b>LV mass</b>                          | 114.58±8.92                 | 119.11±2.61                                                           | 293.46±17.26*             | 196.82±18.56*†                                                      |
| <b>LV mass<br/>corrected</b>            | 92.27±7.13                  | 95.89±2.09                                                            | 235.37±13.81*             | 158.06±14.85*†                                                      |
| <b>LV Vol d<br/>(μL)</b>                | 71.57±6.47                  | 77.80±2.49                                                            | 127.19±3.23*              | 85.26±6.44*†                                                        |
| <b>LV Vol s<br/>(μL)</b>                | 30.82±4.12                  | 32.49±1.98                                                            | 105.32±3.86*              | 51.82±5.28*†                                                        |
| <b>HR (bpm)</b>                         | 448.60±15.3                 | 457.20±15.86                                                          | 453.86±8.21               | 454.57±11.77                                                        |
| <b>Pressure<br/>gradient<br/>(mmHg)</b> |                             |                                                                       | 52.57±2.89                | 52.43±2.89                                                          |

Data are mean ± SEM. Significance was determined using Kruskal-Wallis test followed by Bonferroni corrections. \* $P < 0.05$  vs. sham; †  $P < 0.05$  vs. STG MI. IVSd: interventricular septum thickness in diastole; IVSs: interventricular septum thickness in systole; LVIDd: left ventricular end-diastolic diameter; LVIDs: left ventricular end-systolic diameter; LVPWd: left ventricle posterior wall thickness in diastole/systole; LVPWs: left ventricle posterior wall thickness in diastole/systole; EF: ejection fraction; FS: fractional shortening; LV Vol d: left ventricular end-diastolic volume; LV Vol s: left ventricular end-systolic volume; HR: heart rate.

**Supplementary Table 2:** Cardiac function measured by echocardiography after tamoxifen treatment for 8 weeks:

|                          | <i>Tcf21</i> <sup>MCM+/-</sup><br>N=6 | <i>Tcf21</i> <sup>MCM-/-</sup><br><i>Ctnnb1</i> <sup>fl/fl</sup><br>N=6 | <i>Postn</i> <sup>MCM+/-</sup><br>N=6 | <i>Postn</i> <sup>MCM-/-</sup><br><i>Ctnnb1</i> <sup>fl/fl</sup><br>N=6 |
|--------------------------|---------------------------------------|-------------------------------------------------------------------------|---------------------------------------|-------------------------------------------------------------------------|
| <b>IVSd (mm)</b>         | 0.78±0.02                             | 0.78±0.03                                                               | 0.93±0.02                             | 0.91±0.02                                                               |
| <b>IVSs (mm)</b>         | 1.15±0.02                             | 1.27±0.07                                                               | 1.30±0.03                             | 1.42±0.09                                                               |
| <b>LVIDd (mm)</b>        | 3.53±0.14                             | 3.79±0.07                                                               | 3.68±0.13                             | 3.94±0.07                                                               |
| <b>LVIDs (mm)</b>        | 2.35±0.12                             | 2.48±0.08                                                               | 2.50±0.12                             | 2.66±0.08                                                               |
| <b>LVPWd (mm)</b>        | 0.79±0.07                             | 0.74±0.04                                                               | 0.94±0.07                             | 0.89±0.05                                                               |
| <b>LVPWs (mm)</b>        | 1.00±0.08                             | 1.07±0.08                                                               | 1.15±0.08                             | 1.22±0.08                                                               |
| <b>EF (%)</b>            | 63.35±2.07                            | 64.66±1.65                                                              | 61.26±2.11                            | 61.64±1.37                                                              |
| <b>FS (%)</b>            | 33.67±1.48                            | 34.79±1.19                                                              | 32.28±1.45                            | 32.67±0.94                                                              |
| <b>LV mass</b>           | 93.67±11.51                           | 99.63±3.60                                                              | 126.76±11.01                          | 134.23±5.58                                                             |
| <b>LV mass corrected</b> | 75.53±9.21                            | 80.30±2.88                                                              | 102.01±8.81                           | 107.99±4.46                                                             |
| <b>LV Vol d (μL)</b>     | 52.60±5.15                            | 61.89±2.70                                                              | 57.96±4.96                            | 67.9±3.02                                                               |
| <b>LV Vol s (μL)</b>     | 19.48±2.48                            | 22.00±1.82                                                              | 22.64±2.53                            | 26.21±1.99                                                              |
| <b>HR (bpm)</b>          | 454.33±9.52                           | 453.17±8.74                                                             | 453.17±9.46                           | 450.17±8.70                                                             |

Data are mean ± SEM.

**Supplementary Table 3: Primers for qRT-PCR and ChIP**

| <b>Genotyping primers</b>     |                                   |                                   |
|-------------------------------|-----------------------------------|-----------------------------------|
| <b>Gene</b>                   | <b>Forward Sequence</b>           | <b>Reverse Sequence</b>           |
| <i>Cre</i>                    | GCGGTCTGGCAGTAAAACTATC            | GTGAAACAGCATTGCTGTCACTT           |
| <i>Ctnnb1<sup>fl/fl</sup></i> | AAGGTAGAGTGATGAAAGTTGTT           | CACCATGTCCTCTGTCTATTC             |
| <i>ROSA<sup>mTmG</sup></i>    | CTCTGCTGCCTCCTGGCTTCT             | TCAATGGGCGGGGGTTCGTT              |
| <b>qRT-PCR primers</b>        |                                   |                                   |
| <b>Gene</b>                   | <b>Forward Sequence</b>           | <b>Reverse Sequence</b>           |
| <i>L7</i>                     | AAGACGAAGGAGCTGCAGAAC             | GAAGCTCATCTATGAGAAGGC             |
| <i>Axin2</i>                  | GAGTAGCGCCGTGTTAGTGACT            | CCAGGAAAGTCCGGAAGAGGTATG          |
| <i>Coll1a1</i>                | TCCTGACGCATGGCCAAGAAGACA          | TCCGGGCAGAAAGCACAGCACTC           |
| <i>Col3a1</i>                 | GCACAGCAGTCCACCGTAGA              | TCTCCAAATGGGATCTCTGG              |
| <i>Postn</i>                  | CGAAGGGGACAGTATCTCCA              | AGGTCGGTGAAAGTGGTTTG              |
| <i>Fn1</i>                    | ATGTGGACCCCTCCTGATAGT             | GCCCAGTGATTTTCAGCAAAGG            |
| <i>Acta2</i>                  | GTCCCAGACATCAGGGAGTAA             | TCGGATACTTCAGCGTCAGGA             |
| <i>Myh7</i>                   | ATGTGCCGGACCTTGGAAG               | CCTCGGGTTAGCTGAGAGATCA            |
| <b>ChIP primers</b>           |                                   |                                   |
| <b>Gene</b>                   | <b>Forward Sequence</b>           | <b>Reverse Sequence</b>           |
| <i>Axin2</i>                  | P+1828: TCCCGTGTCACTGTTTCT        | P+1944: AGGTGCTCGTCTCAAGTAT       |
| <i>Col3a1</i>                 | P-4700:<br>ACCAACAGATTGGGAAAGG    | P-4566:<br>CTCGGGTGAGAATTCTTTGT   |
| <i>Postn</i>                  | P-3585:<br>GGAAGAGACTGCTAATTCCTAC | P-3458:<br>GAGACATCTAGTGGAGAAAGTG |
| <i>negative</i>               | ATGGTTGCCACTGGGGATCT              | TGCCAAAGCCTAGGGGAAGA              |
